# Supplementary material for: Descriptive, Retrospective Study of the Clinical Characteristics of Asymptomatic COVID-19 Patients
Source: PubMed Central journal article supplement (PMC7568656; doi:10.1128/msphere.00922-20), 2020-10-07

### LYM

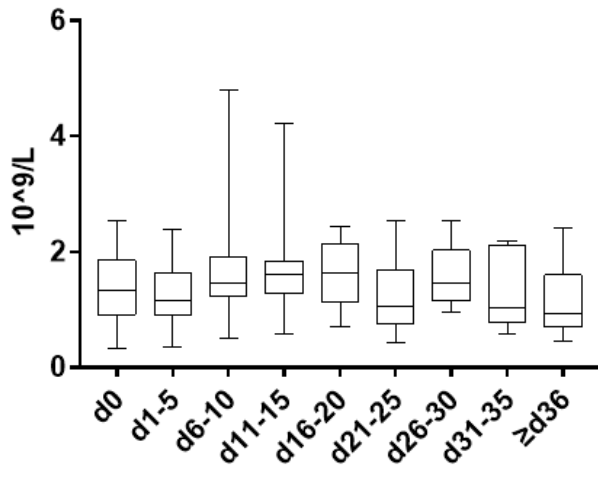

### EOS

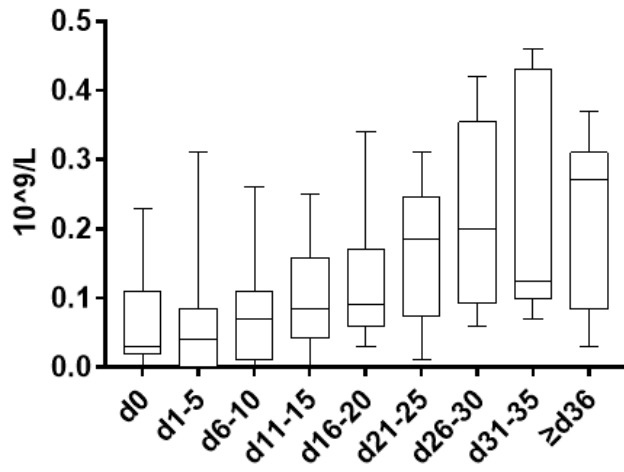

### BASO

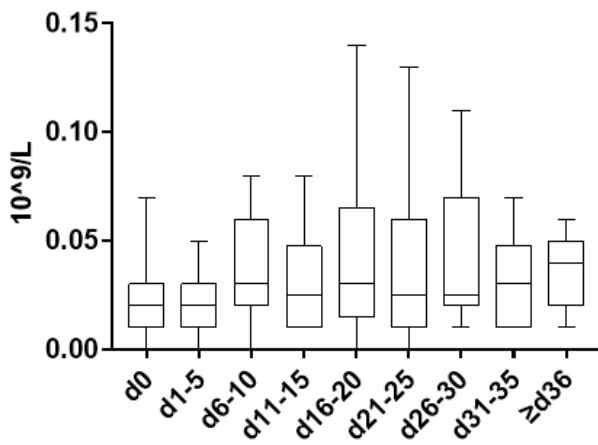

Supplement: mSphere.00922-20-sf001.pdf [file mSphere.00922-20-sf001.pdf]
